# Supplementary material for: Photosensitizing properties of 2,4-dichlorobenzoic acid and chlorinated biphenyl carboxylic acids, potentially key components of chromophoric dissolved organic matter
Source: Royal Society of Chemistry journal article supplement (doi:10.1039/b506971h), 2005-01-01
Supplement: b506971h.pdf [file b506971h.pdf]

**Photosensitizing properties of 2,4-dichlorobenzoic acid and chlorinated biphenyl carboxylic acids, potentially key components of chromophoric dissolved organic matter.**

Anne L. Boreen and Kristopher McNeill\*

Department of Chemistry, University of Minnesota, 207 Pleasant Street SE, Minneapolis, MN 55455

*Absorbance of the model compounds of marine CDOM*

Molar absorptivities of each compound were obtained from the slope of a linear fit to a plot of absorbance versus concentration at a particular wavelength in each of the solvents listed. Absorbance spectra were acquired on a Jasco V-530 spectrophotometer.

**Table S1** Molar absorptivities of the model compounds in CH<sub>3</sub>CN, H<sub>2</sub>O (D<sub>2</sub>O), and EtOH at 300, 266, and 254 nm.

| Compound            | Solvent                                          | $\epsilon_{300 \text{ nm}}$ | $\epsilon_{266 \text{ nm}}$ | $\epsilon_{254 \text{ nm}}$ |
|---------------------|--------------------------------------------------|-----------------------------|-----------------------------|-----------------------------|
| 2,4-DCBA            | CH <sub>3</sub> CN                               | 40 ± 1                      | 776 ± 7                     | nd                          |
|                     | EtOH                                             | nd <sup>a</sup>             | 747 ± 3                     | nd                          |
|                     | H <sub>2</sub> O (D <sub>2</sub> O) <sup>b</sup> | 25 ± 1                      | 477 ± 8                     | 1080 ± 20                   |
| BA                  | CH <sub>3</sub> CN                               | < 1                         | 750 ± 10                    | nd                          |
|                     | EtOH                                             | nd                          | 730 ± 3                     | nd                          |
|                     | H <sub>2</sub> O (D <sub>2</sub> O)              | < 1                         | 559 ± 1                     | 711 ± 8                     |
| TCB                 | CH <sub>3</sub> CN                               | 42 ± 2                      | 154 ± 4                     | 93 ± 2                      |
| BPA                 | CH <sub>3</sub> CN                               | 2950 ± 40                   | 21500 ± 200                 | nd                          |
|                     | EtOH                                             | nd                          | 21000 ± 70                  | nd                          |
|                     | H <sub>2</sub> O (D <sub>2</sub> O)              | 1400 ± 100                  | nd                          | 15000 ± 1000                |
| <i>mono</i> -Cl-BPA | CH <sub>3</sub> CN                               | 150 ± 10                    | 12000 ± 100                 | 14900 ± 100                 |
|                     | EtOH                                             | nd                          | 14200 ± 500                 | 16400 ± 500                 |
|                     | H <sub>2</sub> O (D <sub>2</sub> O)              | 180 ± 10                    | nd                          | 14700 ± 600                 |
| <i>di</i> -Cl-BPA   | CH <sub>3</sub> CN                               | 3080 ± 30                   | 12500 ± 100                 | nd                          |
|                     | EtOH                                             | nd                          | 27700 ± 800                 | nd                          |
|                     | H <sub>2</sub> O (D <sub>2</sub> O)              | 4400 ± 100                  | nd                          | 16200 ± 400                 |
| PCB-47              | CH <sub>3</sub> CN                               | < 1                         | 1640 ± 20                   | 4770 ± 10                   |

<sup>a</sup> nd = not determined. <sup>b</sup> 266 nm molar absorptivities were measured in D<sub>2</sub>O.

*Calculation of environmental half-lives*

Environmental half-lives ( $t_{1/2}$ ) were calculated according to Eq (S1).

$$t_{1/2} = \frac{\ln 2}{(\sum \epsilon_{\lambda} L_{\lambda}) \Phi_{\text{direct}}} \quad (\text{S1})$$

# Supplementary Material (ESI) for Chemical Communications  
# This journal is © The Royal Society of Chemistry 2005

In Eq (S1),  $\epsilon_{\lambda}$  are the molar absorptivities of the substrate at a given wavelength,  $L_{\lambda}$  values are the solar intensity obtained from Leifer for 30° N and represent a 24 hour average intensity.<sup>1</sup> The wavelength range of 296 – 440 nm was used, corresponding to environmentally relevant wavelengths.

**Table S2** Aquatic environmental half-lives for model CDOM components based on direct photolysis.

| Compound        | $t_{1/2}^a$ |
|-----------------|-------------|
| 2,4-DCBA        | 21 days     |
| BPA             | 3 yrs       |
| 2'-Cl-BPA       | 4 hrs       |
| 3',4'-di-Cl-BPA | 13 days     |

<sup>a</sup> Calculated based on a 24 hour average sunlight intensity at 30° N.

#### Supporting Information References

1. A. Leifer, *The Kinetics of Environmental Aquatic Photochemistry: Theory and Practice*. American Chemical Society: Washington, DC, 1988.
